# Supplementary material
Source: PubMed Central journal article supplement (PMC2743173)
Supplement: NIHMS77096-supplement-01.pdf [file NIHMS77096-supplement-01.pdf]

Neuron, volume 60  
**Supplemental Data**

**LRP4 Serves as a Coreceptor of Agrin**

Bin Zhang, Shiwen Luo, Qiang Wang, Tatsuo Suzuki, Wen C. Xiong, and Lin Mei

Figure S1 Zhang et al.

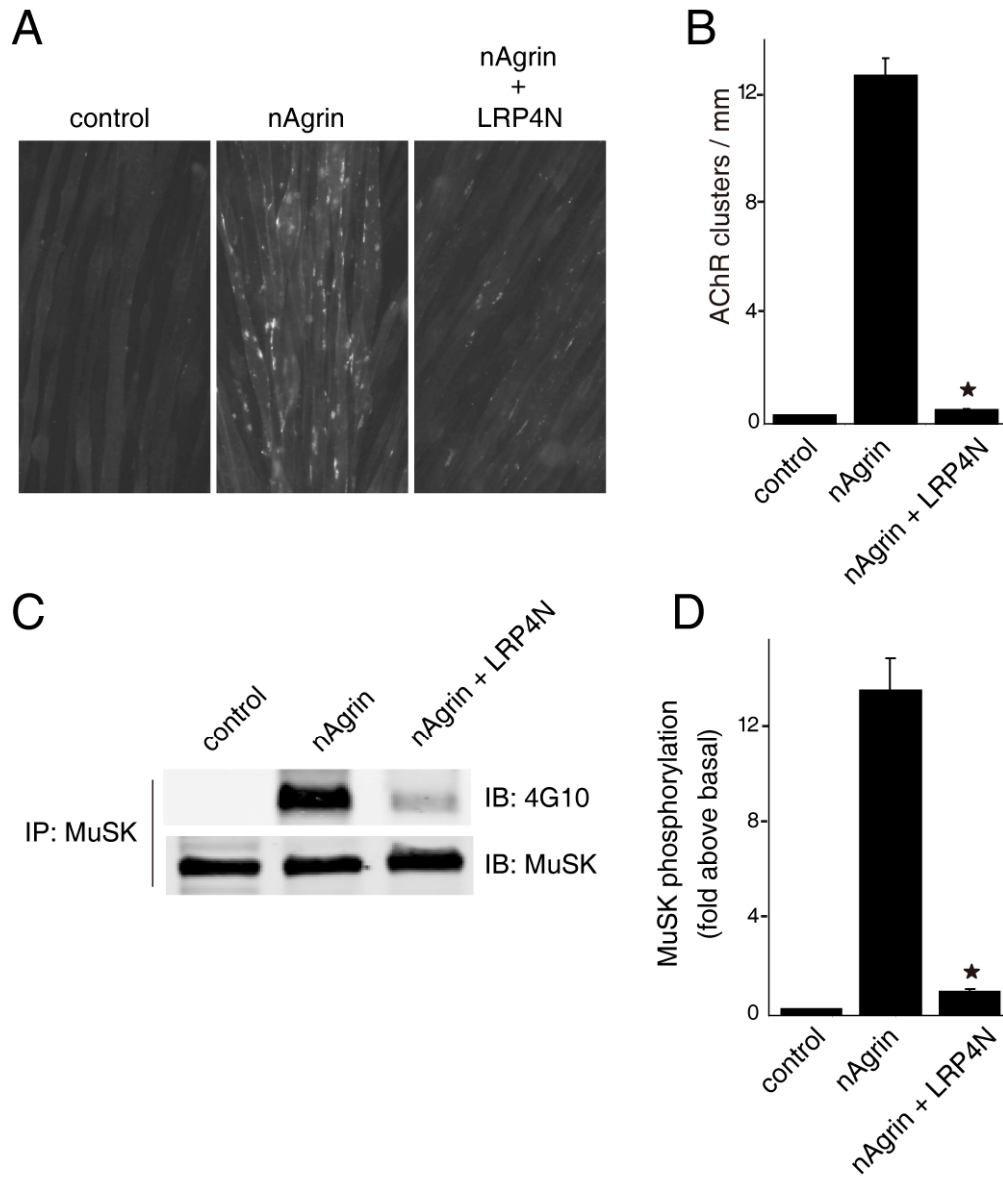

Supplemental Figure 1  
Zhang et al.

**Figure S1. Attenuation of agrin function by LRP4 extracellular domain**

(A) Attenuation of agrin-induced AChR clustering by the extracellular domain of LRP4. C2C12 myotubes were treated without (control) or with neuronal agrin (nAgrin) or nAgrin that was pre-incubated with LRP4N-Myc immobilized on beads for 18 hr. Representative myotubes were shown.

(B) Quantitative analysis of data in A. Data shown were mean  $\pm$  SEM, n = 5; \*, p < 0.05 in comparison with nAgrin.

(C) Inhibition of MuSK phosphorylation by the extracellular domain of LRP4. C2C12 myotubes were treated as in A, except for 1 hr. Lysates were subjected to immunoprecipitation with rabbit anti-MuSK antibody. Resulting precipitates were probed with the anti-phospho-tyrosine antibody 4G10. Precipitates were also probed with anti-MuSK antibody to demonstrate equal amounts.

(D) Quantitative analysis of data in C. Data shown were mean  $\pm$  SEM, n = 3; \*, p < 0.05 in comparison with the no-agrin group.
